# Supplementary material for: A sandwich-like structural model revealed for quasi-2D perovskite films
Source: Royal Society of Chemistry journal article supplement (doi:10.1039/d1tc00606a), 2021-01-01
Supplement: d1tc00606a1.pdf [file d1tc00606a1.pdf]

## Electronic Supplementary Information (ESI)

### A Sandwich-Like Structural Model Revealed for Quasi-2D Perovskite Films

Fei Zheng,<sup>a</sup> Christopher R. Hall,<sup>a</sup> Dechan Angmo,<sup>b</sup> Chuantian Zuo,<sup>b</sup> Sergey Rubanov,<sup>c</sup> Zhenchuan Wen,<sup>d</sup> Siobhan J. Bradley,<sup>a</sup> Xiaotao Hao,<sup>d</sup> Mei Gao,<sup>b</sup> Trevor A. Smith,<sup>a</sup> and Kenneth P. Ghiggino<sup>\*a</sup>

<sup>a</sup> School of Chemistry and ARC Centre of Excellence in Exciton Science, The University of Melbourne, Parkville, Victoria 3010, Australia.

<sup>b</sup> Flexible Electronics Laboratory, CSIRO Manufacturing, Clayton, VIC 3168, Australia

<sup>c</sup> Advanced Microscopy Facility, Bio21 Institute, The University of Melbourne, Victoria 3010, Australia

<sup>d</sup> School of Physics, State Key Laboratory of Crystal Materials, Shandong University, Jinan 250100, Shandong, China

\*Corresponding author information: Email: [ghiggino@unimelb.edu.au](mailto:ghiggino@unimelb.edu.au) (Kenneth P. Ghiggino)

#### Supplementary Text:

The crystal parameters ( $a$ ,  $c$ ,  $b$ ) of the  $\text{BA}_2\text{MA}_{n-1}\text{Pb}_n\text{I}_{3n+1}$  RPPs with  $n=3, 4, 5$  are taken from literature reports and listed in **Table S1**.<sup>1,2</sup> For large- $n$  ( $n=L$ ), but not 3D, RPPs, the  $a$ ,  $c$  values are expected to be identical to those for small- $n$  RPPs and the  $b$  value can be approximated to be infinity, as  $b$  has little influence on the peak position of the  $(\bar{1}1\bar{1})$  diffraction feature for large- $n$  RPPs. The  $q$  values for  $(\bar{1}1\bar{1})$  diffraction peaks are calculated by the following equation:

$$q_{(\bar{1}1\bar{1})} = 2\pi \sqrt{\frac{1}{a^2} + \frac{1}{b^2} + \frac{1}{c^2}} \quad (\text{S-1})$$

**Table S1.** The crystal parameters ( $a$ ,  $c$ ,  $b$ ) and the calculated  $q_{(\bar{1}1\bar{1})}$  values for  $\text{BA}_2\text{MA}_{n-1}\text{Pb}_n\text{I}_{3n+1}$  RPPs with  $n=3, 4, 5$  and  $n=L$ .

|       | $a$ (Å) | $c$ (Å) | $b$ (Å)  | $q_{(\bar{1}1\bar{1})}$ (nm <sup>-1</sup> ) |
|-------|---------|---------|----------|---------------------------------------------|
| $n=3$ | 8.93    | 8.88    | 51.96    | 10.06                                       |
| $n=4$ | 8.93    | 8.88    | 64.38    | 10.02                                       |
| $n=5$ | 8.93    | 8.91    | 77.01    | 9.99                                        |
| $n=L$ | 8.93    | 8.91    | $\infty$ | 9.95                                        |

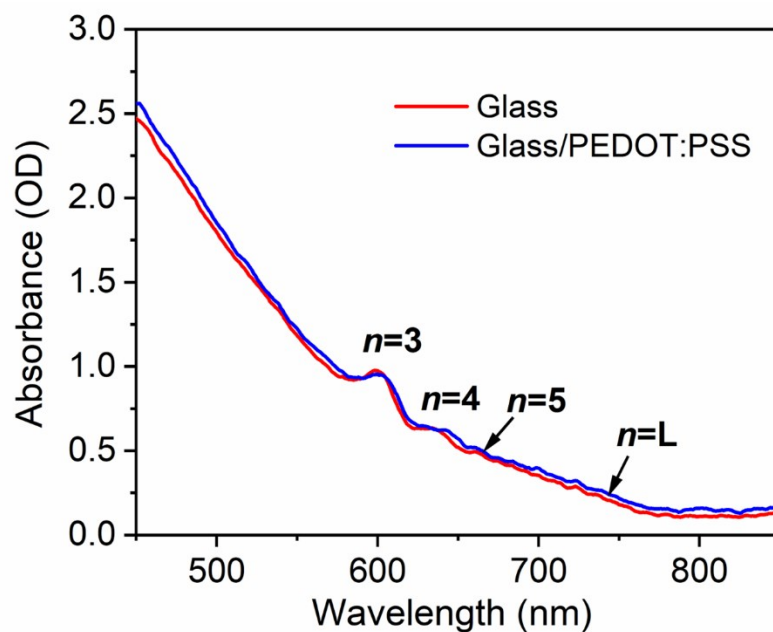

**Fig. S1** UV-Vis absorption spectra of the  $\text{BA}_2\text{MA}_{n-1}\text{Pb}_n\text{I}_{3n+1}$  ( $\langle n \rangle = 5$ ) quasi-2D perovskite films drop-cast on bare glass and PEDOT:PSS coated glass substrates.

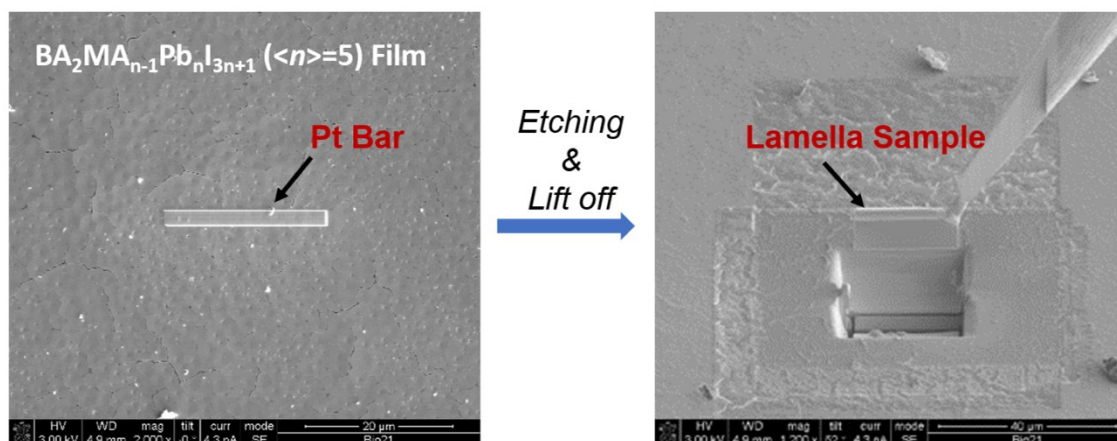

**Fig. S2** The procedure for preparing the  $\text{Glass}/\text{BA}_2\text{MA}_{n-1}\text{Pb}_n\text{I}_{3n+1}$  ( $\langle n \rangle = 5$ ) Quasi-2D Perovskite/Carbon/Pt lamella sample using the lift-off FIB technique.

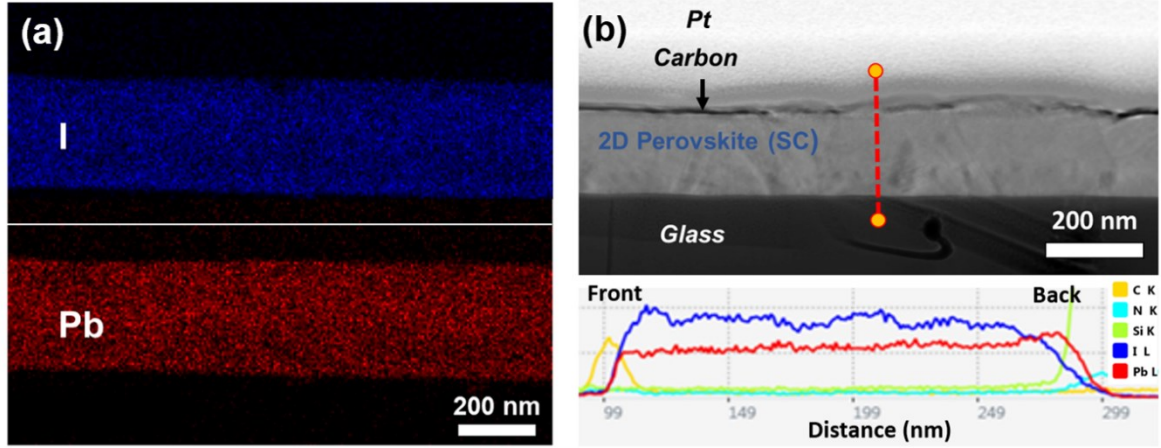

**Fig. S3** (a) STEM-EDAX elemental mapping of iodine (I) (upper panel) and lead (Pb) (lower panel) in the drop-cast  $\text{BA}_2\text{MA}_{n-1}\text{Pb}_n\text{I}_{3n+1}$  ( $\langle n \rangle = 5$ ) Quasi-2D perovskite film lamella within the rectangular area indicated in Fig. 1e; (b) The high-angle annular dark-field (HAADF) STEM image of the spin-coated (SC)  $\text{BA}_2\text{MA}_{n-1}\text{Pb}_n\text{I}_{3n+1}$  ( $\langle n \rangle = 5$ ) quasi-2D perovskite film lamella (upper panel) and the corresponding EDAX line scan profile of I and Pb along the labeled red dashed line (lower panel).

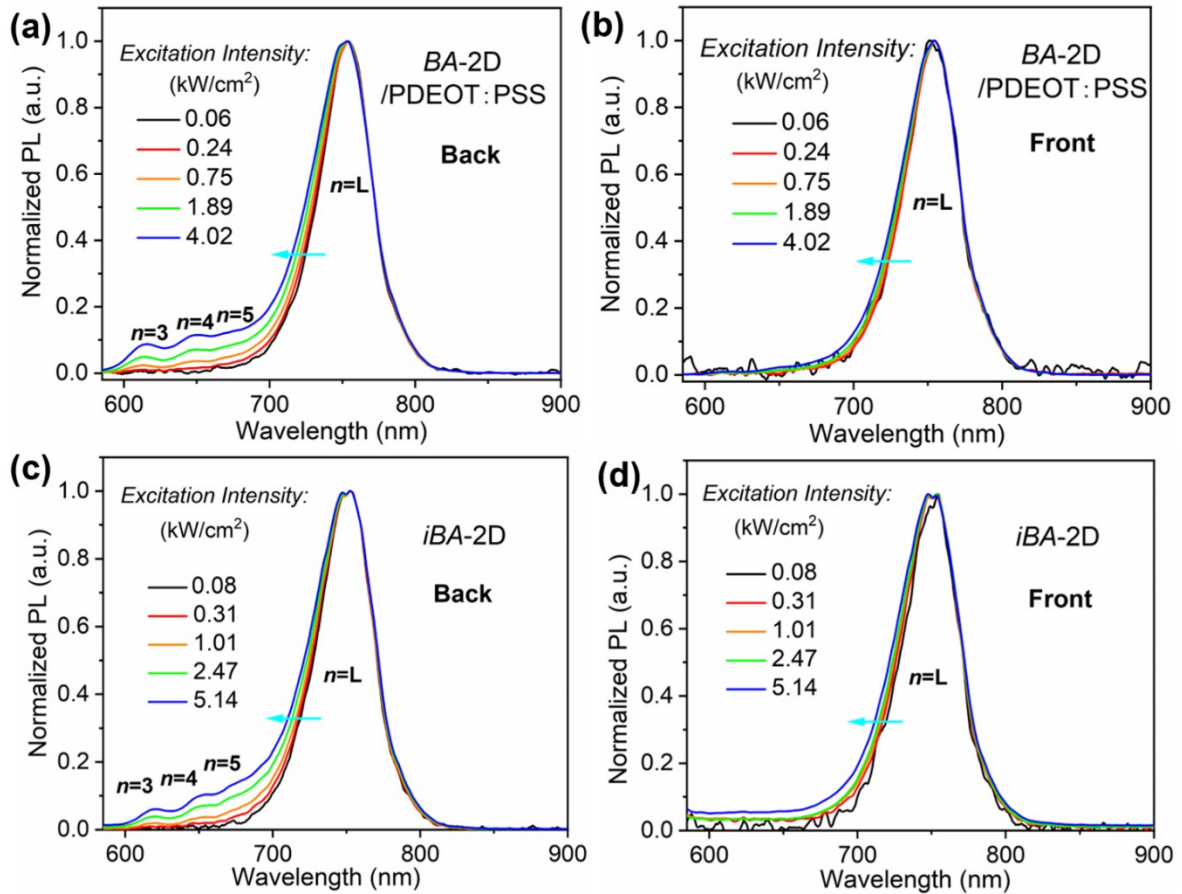

**Fig. S4.** Excitation intensity-dependent PL spectra collected from (a) the back-side and (b) the front-side of the  $\text{BA}_2\text{MA}_{n-1}\text{Pb}_n\text{I}_{3n+1}$  ( $\langle n \rangle = 5$ ) quasi-2D perovskite films drop-cast on the PEDOT:PSS coated glass substrate; (Excitation laser: 400 nm, 5.4 MHz.) Excitation intensity-dependent PL spectra collected from (c) the back-side and (d) the front-side of the  $\text{iBA}_2\text{MA}_{n-1}\text{Pb}_n\text{I}_{3n+1}$  ( $\langle n \rangle = 5$ ) quasi-2D perovskite films drop-cast on the glass substrate. (Excitation laser: 450 nm, 5.4 MHz.)

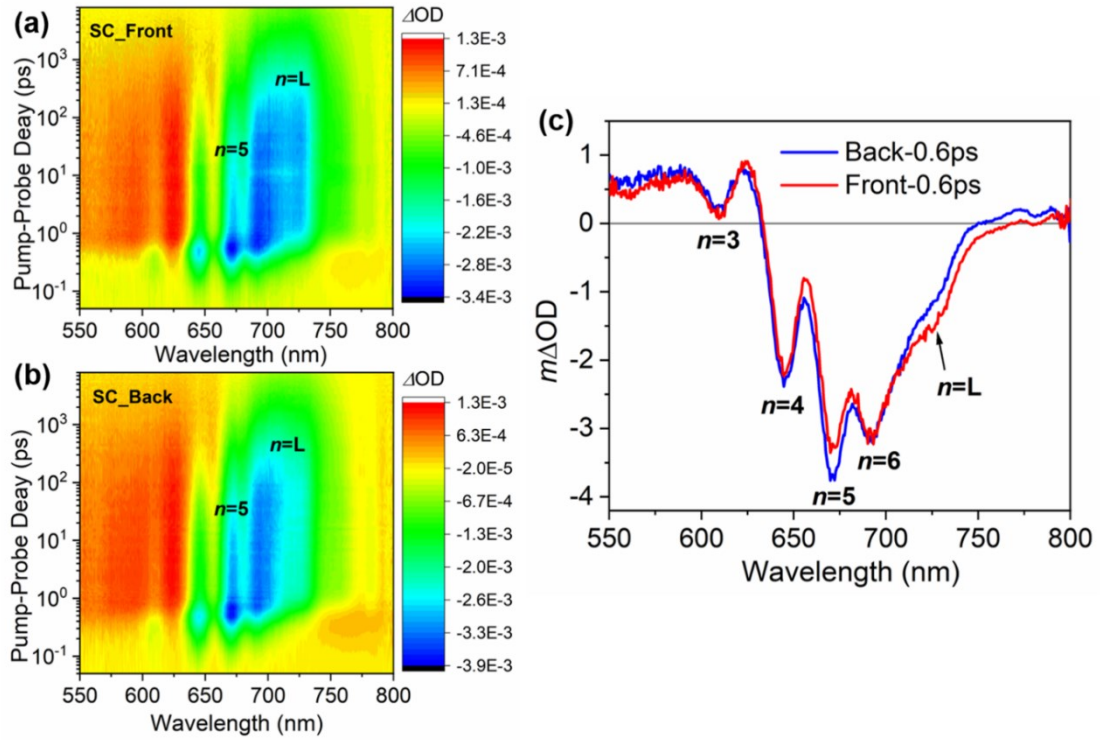

**Fig. S5.** Pseudo-color 2D plots of TA spectra ( $\Delta OD$ ) of the spin-coated (SC)  $BA_2MA_{n-1}Pb_nI_{3n+1}$  ( $\langle n \rangle = 5$ ) quasi-2D perovskite film obtained under (a) front- and (b) back-side excitation; (c) TA spectra of the (SC) quasi-2D perovskite film as a function of probe wavelength recorded at 0.6 ps pump-probe delay.

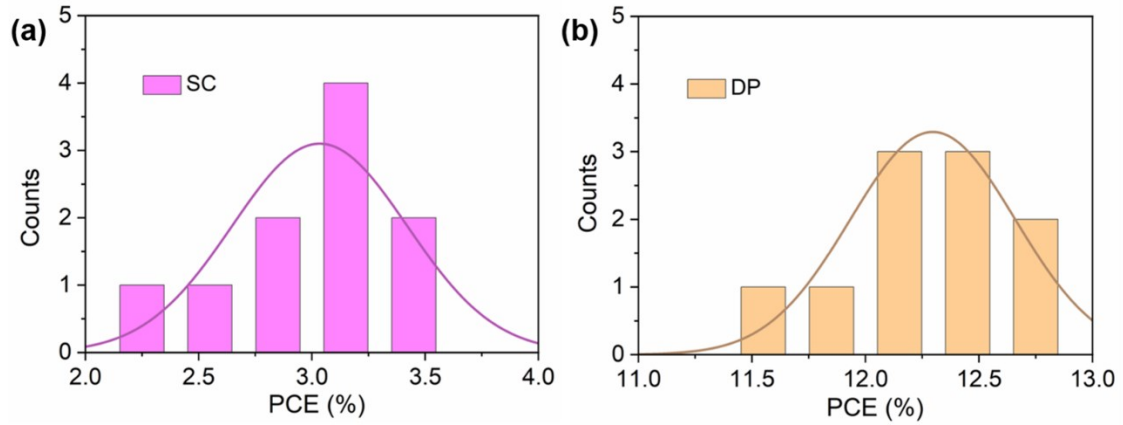

**Fig. S6.** The statistics of PCE distribution for (a) spin-coated (SC) PSCs and (b) drop-cast (DP) PSCs based on  $BA_2MA_{n-1}Pb_nI_{3n+1}$  ( $\langle n \rangle = 5$ ) quasi-2D perovskite films.

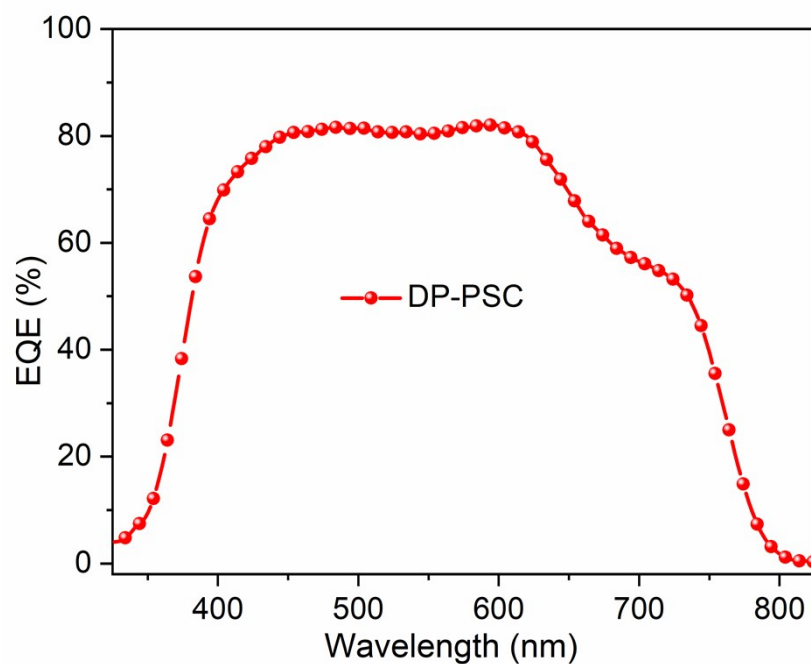

**Fig. S7.** The external quantum efficiency (EQE) spectrum of a perovskite solar cell based on the drop-cast  $\text{BA}_2\text{MA}_{n-1}\text{Pb}_n\text{I}_{3n+1}$  ( $\langle n \rangle = 5$ ) quasi-2D perovskite film (DP-PSC).

## References

- 1 C. C. Stoumpos, D. H. Cao, D. J. Clark, J. Young, J. M. Rondinelli, J. I. Jang, J. T. Hupp, M. G. Kanatzidis, *Chem. Mater.*, 2016, **28**, 2852-2867.
- 2 C. C. Stoumpos, C. M. M. Soe, H. Tsai, W. Nie, J.-C. Blancon, D. H. Cao, F. Liu, B. Traoré, C. Katan, J. Even, A. D. Mohite, M. G. Kanatzidis, *Chem*, 2017, **2**, 427-440.
